# Supplementary material for: Prolyl Oligopeptidase from the Blood Fluke Schistosoma mansoni: From Functional Analysis to Anti-schistosomal Inhibitors
Source: PubMed Central journal article supplement (PMC4454677; doi:10.1371/journal.pntd.0003827), 2015-06-03
Supplement: pntd.0003827.s008.pdf [file pntd.0003827.s008.pdf]

**S2 Table. Identification of native SmPOP by mass spectrometry.**

| Peptide sequence | Peptide position (AA residues) | Theoretical peptide mass [M+H] <sup>+</sup> (Da) | Measured peptide mass [M+H] <sup>+</sup> (Da) | Delta (ppm) |
|------------------|--------------------------------|--------------------------------------------------|-----------------------------------------------|-------------|
| FGVQIHDPYR       | 22-31                          | 1230.6145                                        | 1230.6135                                     | -0.79       |
| VKAQNLITEQF      | 45-55                          | 1289.6980                                        | 1289.6913                                     | -5.21       |
| FLDPNEIDPEGLTSLR | 115-130                        | 1814.9050                                        | 1814.9034                                     | -0.87       |
| FSSISWTK         | 175-182                        | 954.4811                                         | 954.4787                                      | -2.49       |
| TSFLTPGIY        | 401-410                        | 1110.5961                                        | 1110.5958                                     | -0.22       |
| DVDLNQFEVK       | 431-440                        | 1205.5928                                        | 1205.5885                                     | -3.54       |
| HNVKIPNSDVQYPALL | 620-636                        | 1893.9949                                        | 1894.0009                                     | 3.16        |

The protein extract of *S. mansoni* adults was subjected to LC-MS/MS analysis to identify peptide fragments specific for SmPOP. The protein extract was precipitated with acetone and digested with trypsin or chymotrypsin. Digests were analyzed on a UltiMate 3000 RSLCnano system (Dionex) coupled to a TripleTOF 5600 mass spectrometer with a NanoSpray III source (AB Sciex). The first dimension column was an Acclaim PepMap 100 column (5 µm, 2 cm × 100 µm ID, Dionex) and the second dimension column was an Acclaim PepMap 100 analytical column (3 µm, 15 cm × 75 µm ID, Dionex). The mass data were processed by the ProteinPilot Software 4.5 (AB Sciex).
