# Supplementary material for: Prolyl Oligopeptidase from the Blood Fluke Schistosoma mansoni: From Functional Analysis to Anti-schistosomal Inhibitors
Source: PubMed Central journal article supplement (PMC4454677; doi:10.1371/journal.pntd.0003827), 2015-06-03
Supplement: pntd.0003827.s009.pdf [file pntd.0003827.s009.pdf]

**S3 Table. The fragmentation of peptide hormones by live *S. mansoni* adults.**

| <b>Inhibitor Treatment</b> | <b>Hormone</b>       | <b>Identified peptide</b> | <b>Theoretical peptide mass [M+H]<sup>+</sup> (Da)</b> | <b>Measured peptide mass [M+H]<sup>+</sup> (Da)</b> | <b>Fragment (aa residues)</b> |
|----------------------------|----------------------|---------------------------|--------------------------------------------------------|-----------------------------------------------------|-------------------------------|
| <b>No Inhibitor</b>        | <b>Angiotensin I</b> | DRVYIHPFHL                | 1296.6853                                              | 1296.7126                                           | 1-10 (uncleaved)              |
|                            |                      | DRVYIHP                   | 899.4739                                               | 899.4784                                            | 1-7                           |
|                            | <b>Bradykinin</b>    | RPPGFSPFR                 | 1060.5692                                              | 1060.5922                                           | 1-9 (uncleaved)               |
| RPPGFSP                    |                      | 757.3997                  | 757.3717                                               | 1-7                                                 |                               |
| GFSPFR                     |                      | 710.3626                  | 710.3131                                               | 4-9                                                 |                               |
| <b>E-64</b>                | <b>Angiotensin I</b> | DRVYIHPFHL                | 1296.6853                                              | 1296.7163                                           | 1-10 (uncleaved)              |
|                            |                      | DRVYIHP                   | 899.4739                                               | 899.4788                                            | 1-7                           |
|                            | <b>Bradykinin</b>    | RPPGFSPFR                 | 1060.5692                                              | 1060.5894                                           | 1-9 (uncleaved)               |
|                            |                      | RPPGFSP                   | 757.3997                                               | 757.3730                                            | 1-7                           |
|                            |                      | GFSPFR                    | 710.3626                                               | 710.3341                                            | 4-9                           |
| <b>Z-Ala-Pro-CMK</b>       | <b>Angiotensin I</b> | DRVYIHPFHL                | 1296.6853                                              | 1296.7068                                           | 1-10 (uncleaved)              |
|                            | <b>Bradykinin</b>    | RPPGFSPFR                 | 1060.5692                                              | 1060.5894                                           | 1-9 (uncleaved)               |

The peptide hormones were incubated with live adult schistosomes in culture in the presence of given inhibitor and the cultivation medium was analyzed after 16 h by MALDI-TOF mass spectrometry to identify any resulting hydrolytic fragments. For technical details, see the Materials and Methods and Figure 8.
